# Supplementary material for: Using ternary steric hindrance synergy of a defective MoS2 monolayer to manipulate the electrocatalytic mechanism toward nitric oxide reduction: a first-principles and machine learning study
Source: Royal Society of Chemistry journal article supplement (doi:10.1039/d3ta00211j), 2023-01-01
Supplement: d3ta00211j1.pdf [file d3ta00211j1.pdf]

## *Supporting Information*

### **Using ternary steric hindrance synergism of defective MoS<sub>2</sub> monolayer to manipulate electrocatalytic mechanism toward nitric oxide reduction: A first-principles and machine learning study**

Lei Yang, Jiake Fan, Weihua Zhu\*

*Institute for Computation in Molecular and Materials Science, School of Chemistry and Chemical  
Engineering, Nanjing University of Science and Technology, Nanjing 210094, China*

---

\* Corresponding author. E-mail: zhuwh@njust.edu.cn

**Figure S1.** The Gibbs free energy changes of NORR on Fe@MoS<sub>2</sub> with the different spins of Fe atom.

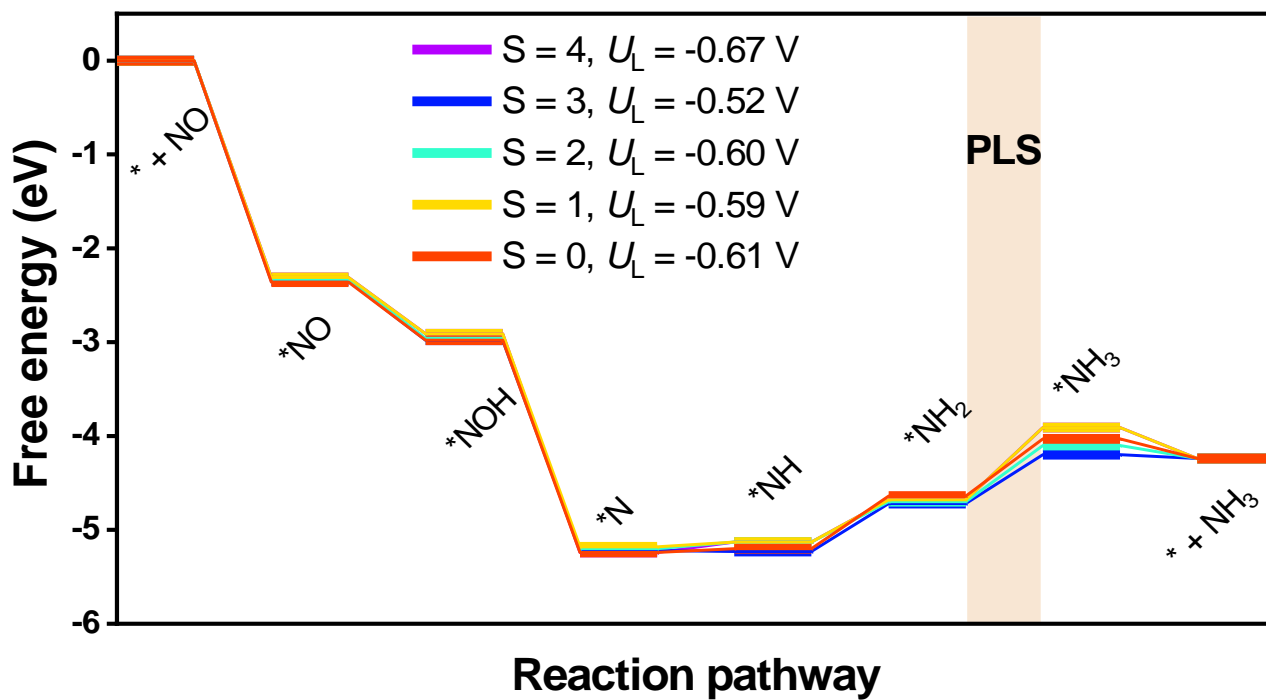

**Figure S2.** The corresponding energies (Ha) of different species adsorbed on Fe@MoS<sub>2</sub> after geometry optimization with initial spins set from 0 to 4.

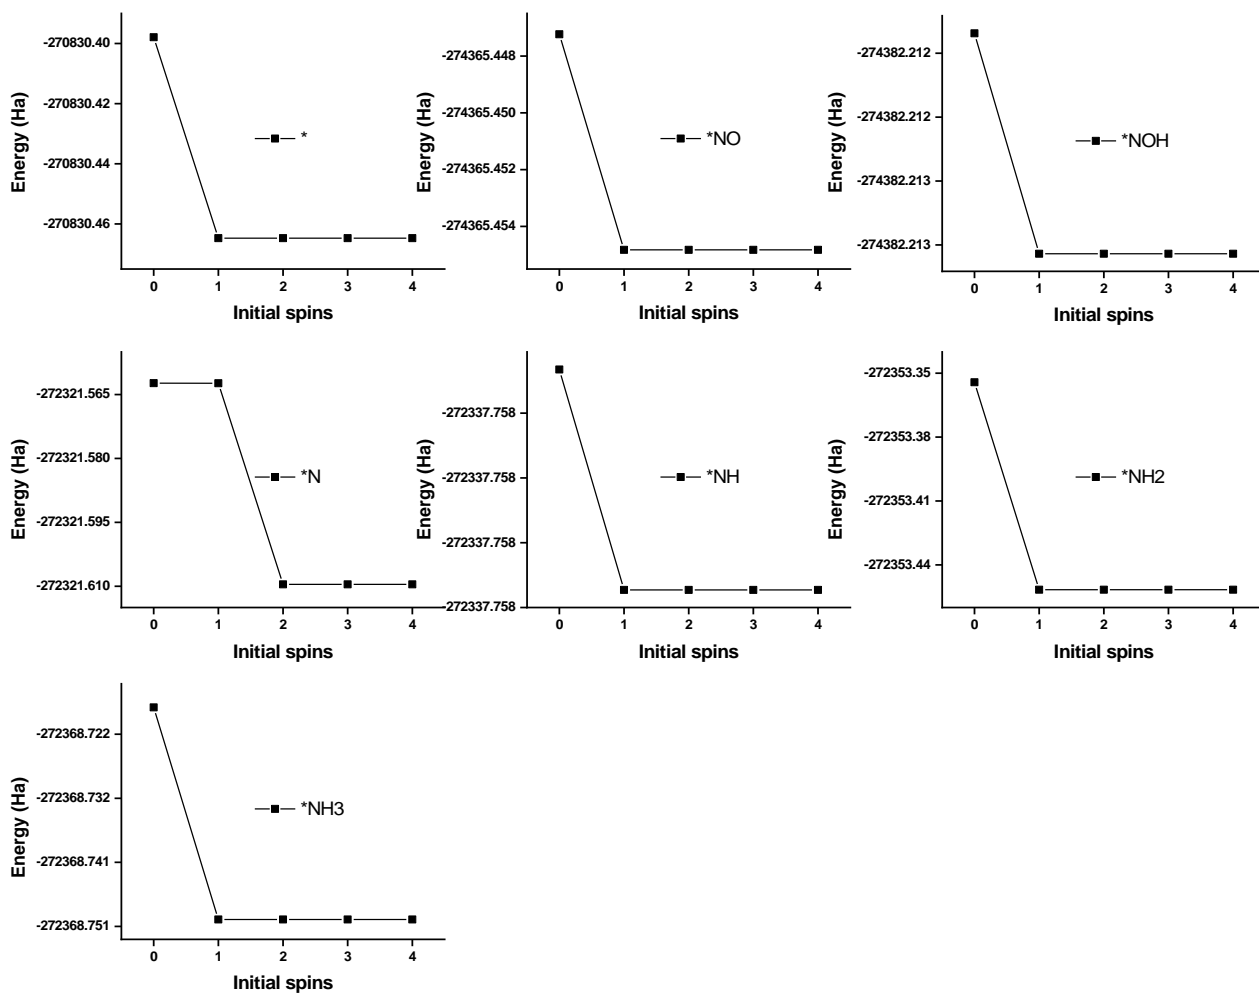

**Table S1.** The calculated  $E_f$  and  $U_{\text{diss}}$  of TM@MoS<sub>2</sub>. (eV)

| TM | $E_f$ | $U_{\text{diss}}$ |
|----|-------|-------------------|
| Sc | -5.13 | -0.37             |
| Ti | -5.38 | 1.06              |
| V  | -4.44 | 1.04              |
| Cr | -3.41 | 0.79              |
| Mn | -2.92 | 0.27              |
| Fe | -3.23 | 1.17              |
| Co | -3.37 | 1.40              |
| Ni | -2.91 | 1.20              |
| Cu | -1.48 | 1.08              |
| Zn | -1.83 | 0.16              |
| Y  | -4.76 | -0.78             |
| Zr | -5.55 | -0.06             |
| Nb | -4.99 | 0.56              |
| Mo | -4.13 | 1.18              |
| Ru | -3.38 | 2.15              |
| Rh | -3.43 | 2.31              |
| Pd | -2.56 | 2.23              |
| Ag | -0.94 | 1.74              |
| Cd | -1.58 | 0.39              |
| Hf | -5.47 | -0.18             |
| Ta | -4.92 | 1.04              |
| W  | -3.90 | 1.40              |
| Re | -3.28 | 1.39              |
| Os | -2.84 | 1.19              |
| Ir | -3.09 | 2.19              |
| Pt | -2.75 | 2.56              |
| Au | -1.10 | 1.87              |

**Table S2.** The Gibbs free energy changes of TM@MoS<sub>2</sub>. (eV)

| TM | $\Delta G^*_{\text{NO}}$ | $\Delta G^*_{\text{NOH}}$ | $\Delta G^*_{\text{N}}$ | $\Delta G^*_{\text{NH}}$ | $\Delta G^*_{\text{NH}_2}$ | $\Delta G^*_{\text{NH}_3}$ |
|----|--------------------------|---------------------------|-------------------------|--------------------------|----------------------------|----------------------------|
| Sc |                          |                           |                         |                          |                            |                            |
| Ti | -3.11                    | -3.07                     | -5.62                   | -5.43                    | -5.06                      | -4.27                      |
| V  | -2.93                    | -3.29                     | -5.60                   | -5.47                    | -4.90                      | -3.91                      |
| Cr | -2.50                    | -3.30                     | -5.42                   | -5.53                    | -4.58                      | -3.80                      |
| Mn | -2.13                    | -2.87                     | -4.98                   | -5.08                    | -4.14                      | -3.62                      |
| Fe | -2.35                    | -2.98                     | -5.22                   | -5.23                    | -4.72                      | -4.20                      |
| Co | -2.26                    | -2.59                     | -5.12                   | -4.96                    | -4.81                      | -4.23                      |
| Ni | -2.28                    | -2.51                     | -5.02                   | -4.82                    | -4.90                      | -4.16                      |
| Cu | -2.38                    | -2.67                     | -4.94                   | -4.95                    | -4.95                      | -4.25                      |
| Zn | -2.16                    | -2.45                     | -4.71                   | -4.71                    | -4.88                      | -4.29                      |
| Y  |                          |                           |                         |                          |                            |                            |
| Zr |                          |                           |                         |                          |                            |                            |
| Nb | -2.77                    | -3.19                     | -5.28                   | -5.39                    | -4.88                      | -3.84                      |
| Mo | -2.34                    | -3.18                     | -4.89                   | -5.45                    | -4.27                      | -3.55                      |
| Ru | -2.26                    | -2.83                     | -4.65                   | -5.05                    | -4.34                      | -3.91                      |
| Rh | -2.15                    | -2.40                     | -4.58                   | -4.65                    | -4.64                      | -4.02                      |
| Pd | -2.16                    | -2.32                     | -4.52                   | -4.51                    | -4.74                      | -4.02                      |
| Ag | -2.25                    | -2.44                     | -4.20                   | -4.53                    | -4.92                      | -4.28                      |
| Cd | -2.27                    | -2.32                     | -3.91                   | -4.24                    | -5.06                      | -4.36                      |
| Hf |                          |                           |                         |                          |                            |                            |
| Ta | -2.76                    | -3.20                     | -5.40                   | -5.43                    | -4.84                      | -3.82                      |
| W  | -2.29                    | -3.19                     | -4.91                   | -5.48                    | -4.19                      | -3.47                      |
| Re | -2.44                    | -3.08                     | -4.74                   | -5.37                    | -4.15                      | -3.67                      |
| Os | -2.28                    | -2.88                     | -4.61                   | -5.11                    | -3.87                      | -3.88                      |
| Ir | -2.01                    | -2.35                     | -4.54                   | -4.60                    | -4.45                      | -3.92                      |
| Pt | -2.02                    | -2.11                     | -4.52                   | -4.32                    | -4.63                      | -4.01                      |
| Au | -2.21                    | -2.30                     | -3.80                   | -4.32                    | -5.02                      | -4.43                      |

**Table S3.** The adsorption energies of \*NH<sub>2</sub>, \*NH<sub>3</sub> and \*H on TM@MoS<sub>2</sub>. (eV)

| TM | $E^*_{\text{NH}_2}$ | $E^*_{\text{NH}_3}$ | $E^*_\text{H}$ |
|----|---------------------|---------------------|----------------|
| Sc |                     |                     |                |
| Ti | -4.15               | -0.96               | -1.09          |
| V  | -3.99               | -0.59               | -1.00          |
| Cr | -3.63               | -0.45               | -0.81          |
| Mn | -3.28               | -0.31               | -0.50          |
| Fe | -3.87               | -0.90               | -0.89          |
| Co | -3.97               | -0.88               | -0.89          |
| Ni | -4.04               | -0.88               | -0.90          |
| Cu | -4.14               | -0.97               | -0.93          |
| Zn | -4.06               | -1.01               | -0.84          |
| Y  |                     |                     |                |
| Zr |                     |                     |                |
| Nb | -3.98               | -0.53               | -0.99          |
| Mo | -3.29               | -0.22               | -0.57          |
| Ru | -3.50               | -0.57               | -0.70          |
| Rh | -3.81               | -0.72               | -0.81          |
| Pd | -3.90               | -0.75               | -0.86          |
| Ag | -4.06               | -1.01               | -0.83          |
| Cd | -4.21               | -1.07               | -0.93          |
| Hf |                     |                     |                |
| Ta | -3.90               | -0.50               | -0.98          |
| W  | -3.21               | -0.14               | -0.51          |
| Re | -3.17               | -0.35               | -0.51          |
| Os | -2.87               | -0.51               | -0.58          |
| Ir | -3.66               | -0.63               | -0.72          |
| Pt | -3.79               | -0.68               | -0.79          |
| Au | -4.15               | -1.16               | -0.85          |

**Table S4.** The calculated novel descriptor  $\Omega$ .

| TM | $\Omega$ |
|----|----------|
| Sc |          |
| Ti | 4.28     |
| V  | 4.40     |
| Cr | 4.00     |
| Mn | 3.47     |
| Fe | 3.87     |
| Co | 3.98     |
| Ni | 4.05     |
| Cu | 4.10     |
| Zn | 3.89     |
| Y  |          |
| Zr |          |
| Nb | 4.45     |
| Mo | 3.64     |
| Ru | 3.63     |
| Rh | 3.90     |
| Pd | 4.01     |
| Ag | 3.88     |
| Cd | 4.06     |
| Hf |          |
| Ta | 4.38     |
| W  | 3.58     |
| Re | 3.33     |
| Os | 2.94     |
| Ir | 3.75     |
| Pt | 3.90     |
| Au | 3.84     |

**Table S5.** The calculated  $\Delta ZPE$  and  $T\Delta S$  values of TM@MoS<sub>2</sub>. (eV)

| TM | *NO                    | *NOH                   | *N                     | *NH                    | *NH <sub>2</sub>       | *NH <sub>3</sub>       |
|----|------------------------|------------------------|------------------------|------------------------|------------------------|------------------------|
|    | $\Delta ZPE/T\Delta S$ |
| Sc |                        |                        |                        |                        |                        |                        |
| Ti | 1.92/2.26              | 2.17/2.29              | 1.81/2.23              | 2.09/2.24              | 2.41/2.25              | 2.73/2.33              |
| V  | 1.92/2.25              | 2.18/2.34              | 1.82/2.23              | 2.11/2.24              | 2.41/2.25              | 2.73/2.35              |
| Cr | 1.87/2.31              | 2.19/2.27              | 1.81/2.23              | 2.13/2.22              | 2.39/2.28              | 2.72/2.38              |
| Mn | 1.87/2.32              | 2.19/2.31              | 1.80/2.25              | 2.12/2.24              | 2.43/2.28              | 2.71/2.36              |
| Fe | 1.87/2.35              | 2.18/2.33              | 1.78/2.23              | 2.11/2.25              | 2.44/2.26              | 2.72/2.36              |
| Co | 1.90/2.32              | 2.16/2.37              | 1.78/2.22              | 2.09/2.28              | 2.44/2.26              | 2.71/2.40              |
| Ni | 1.89/2.34              | 2.19/2.34              | 1.79/2.25              | 2.08/2.28              | 2.43/2.27              | 2.70/2.32              |
| Cu | 1.87/2.37              | 2.17/2.37              | 1.74/2.34              | 2.06/2.31              | 2.40/2.32              | 2.68/2.42              |
| Zn | 1.84/2.44              | 2.14/2.44              | 1.74/2.37              | 2.04/2.36              | 2.38/2.37              | 2.67/2.47              |
| Y  |                        |                        |                        |                        |                        |                        |
| Zr |                        |                        |                        |                        |                        |                        |
| Nb | 1.93/2.26              | 2.18/2.35              | 1.82/2.22              | 2.12/2.23              | 2.41/2.25              | 2.74/2.35              |
| Mo | 1.88/2.30              | 2.20/2.27              | 1.81/2.24              | 2.14/2.21              | 2.38/2.29              | 2.73/2.35              |
| Ru | 1.88/2.33              | 2.19/2.32              | 1.78/2.31              | 2.12/2.25              | 2.44/2.28              | 2.72/2.41              |
| Rh | 1.89/2.34              | 2.17/2.37              | 1.79/2.27              | 2.09/2.29              | 2.44/2.27              | 2.71/2.36              |
| Pd | 1.88/2.36              | 2.17/2.38              | 1.78/2.30              | 2.07/2.30              | 2.43/2.29              | 2.70/2.35              |
| Ag | 1.84/2.46              | 2.14/2.46              | 1.73/2.39              | 2.04/2.40              | 2.37/2.39              | 2.67/2.47              |
| Cd | 1.85/2.43              | 2.14/2.45              | 1.73/2.39              | 2.05/2.37              | 2.39/2.37              | 2.67/2.45              |
| Hf |                        |                        |                        |                        |                        |                        |
| Ta | 1.92/2.27              | 2.18/2.36              | 1.82/2.25              | 2.12/2.26              | 2.38/2.29              | 2.72/2.37              |
| W  | 1.87/2.33              | 2.19/2.29              | 1.81/2.26              | 2.13/2.24              | 2.38/2.30              | 2.72/2.36              |
| Re | 1.88/2.32              | 2.18/2.31              | 1.80/2.27              | 2.12/2.26              | 2.39/2.32              | 2.73/2.36              |
| Os | 1.88/2.34              | 2.19/2.34              | 1.79/2.31              | 2.12/2.27              | 2.38/2.34              | 2.72/2.40              |
| Ir | 1.89/2.36              | 2.17/2.40              | 1.80/2.26              | 2.10/2.32              | 2.45/2.28              | 2.72/2.42              |
| Pt | 1.89/2.36              | 2.17/2.40              | 1.79/2.29              | 2.09/2.31              | 2.44/2.30              | 2.71/2.43              |
| Au | 1.84/2.46              | 2.13/2.45              | 1.73/2.43              | 2.06/2.37              | 2.37/2.39              | 2.68/2.47              |
